# Supplementary material
Source: publisher figshare collection journal article supplement (https://acs.figshare.com/ndownloader/files/4128742)
Supplement: Supplementary file 1 [file 4128742]

BIOLUMINESCENCE INHIBITION ASSAY FOR THE DETECTION OF  
HYDROXYLATED POLYCHLORINATED BIPHENYLS

*Krystal Teasley Hamorsky†δ, C. Mark Ensor†, Emre Dikici††, Patrizia Pasini††, Leonidas  
Bachas†††, Sylvia Daunert††\**

† Department of Chemistry, University of Kentucky, Lexington, KY 40506-0055, U.S.A.

††Department of Biochemistry and Molecular Biology, Miller School of Medicine, University of  
Miami, Miami, FL 33136-1019, U.S.A.

††† Department of Chemistry, University of Miami, Coral Gables, FL 33146-0431, U.S.A.

Table of contents:

Figure S-1. Response curve for coelenterazine.

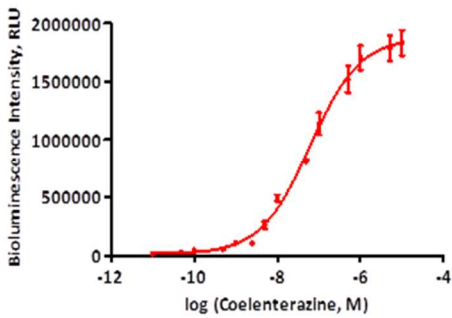

Figure S-1. Response curve for coelenterazine obtained by incubating  $1.21 \times 10^{-7}$  M apoaequorin ( $9.68 \times 10^{-8}$  M final concentration) with various concentrations of native coelenterazine. The data points are an average of three measurements  $\pm 1$  standard deviation. The  $EC_{50}$  value was calculated using non-linear regression fit in GraphPad Prism 5.0 (Sigmoidal Dose-Response (variable slope)).
